# Supplementary material for: Contribution of air-mass transport via the South Asia High to the deep stratosphere in summer
Source: Copernicus journal article supplement (doi:10.5194/acp-2020-990), 2020-11-03
Supplement: Supplementary file [file acp-2020-990-AC1-supplement.pdf]

Thank Dr. Clarmann for his question. The reply is as follow.

Although your and my methods are both derived from mass conservation equation based on the tracer distributions, but your method focuses on the deviation of wind vector and mixing coefficient to minimize residual between modeled atmospheric state and measurement of atmospheric state; my method is to avoid solving velocities and obtain relative contribution of meridional and vertical transport. Therefore, the both are quite different. I'll introduce your work in the introduction section.
